# Supplementary material for: Facet-dependent optical properties of Pd–Cu2O core–shell nanocubes and octahedra
Source: Royal Society of Chemistry journal article supplement (doi:10.1039/c5nr01411e), 2015-01-01
Supplement: c5nr01411e1.pdf [file c5nr01411e1.pdf]

Electronic Supplementary Information

**Facet-Dependent Optical Properties of Pd–Cu<sub>2</sub>O Core–Shell Nanocubes and Octahedra**

Sourav Rej,<sup>‡a</sup> Hsiang-Ju Wang,<sup>‡a</sup> Ming-Xue Huang,<sup>b</sup> Shih-Chen Hsu,<sup>a</sup> Chih-Shan Tan,<sup>c</sup> Fan-Cheng Lin,<sup>a</sup> Jer-Shing Huang,<sup>a</sup> and Michael H. Huang<sup>\*a</sup>

Department of Chemistry, Department of Biomedical Engineering and Environmental Science, and Department of Materials Science and Engineering, National Tsing Hua University, Hsinchu 30013, Taiwan

\*E-mail: hyhuang@mx.nthu.edu.tw

<sup>a</sup>Department of Chemistry

<sup>b</sup>Department of Biomedical Engineering and Environmental Science

<sup>c</sup>Department of Materials Science and Engineering

<sup>‡</sup>These authors contribute equally to this work.

**Synthesis of 40-nm Pd nanocubes**

For the growth of 40-nm Pd cubes, 9313.75  $\mu\text{L}$  of deionized water were respectively introduced into sample vials. Subsequently 0.048 g of CTAC and 0.525 mL of 10 mM  $\text{H}_2\text{PdCl}_4$  solution were added to each of the sample vials. The vials were kept in a water bath set at 35 °C throughout the particle synthesis. Then 37.5  $\mu\text{L}$  of  $1.0 \times 10^{-3}$  M KBr solution was introduced. The vials were left undisturbed in the water bath for 15 min. Next, 3.75  $\mu\text{L}$  of  $1.0 \times 10^{-3}$  M KI solution was introduced and the solution was left undisturbed for another 15 min. Finally, 120  $\mu\text{L}$  of 0.05 M ascorbic acid was added with thorough mixing, and the mixture was kept in the water bath for another 30 min to form Pd nanocubes. The particles were collected by centrifugation at 5500 rpm for 10 min. The precipitate was centrifuged one more time with 10 mL of deionized water at 5500 rpm for 10 min to remove the surfactant and dispersed in 375  $\mu\text{L}$  of deionized water.

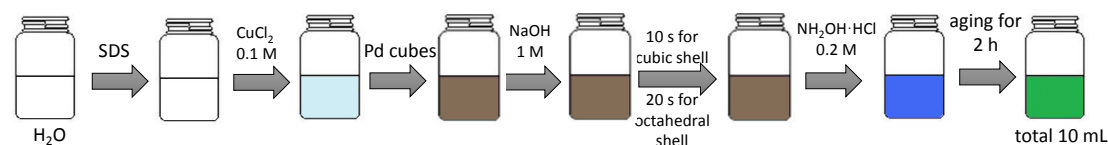

**Fig. S1** Procedure for the preparation of Pd–Cu<sub>2</sub>O nanocrystals. The observed solution colors are also shown.

**Table S1** Amounts of reagents used in the synthesis of Pd–Cu<sub>2</sub>O core–shell nanocubes and octahedra with shell thickness control. 29-nm Pd cubes were used

| Shape      | Size (nm) | SDS (g) | Water (ml) | 0.1 M CuCl <sub>2</sub> (ml) | Pd cubes (ml) | 1 M NaOH (ml) | 0.2 M NH <sub>2</sub> OH.HCl (ml) |
|------------|-----------|---------|------------|------------------------------|---------------|---------------|-----------------------------------|
| Cube       | 64        | 0.087   | 9.390      | 0.070                        | 0.140         | 0.250         | 0.150                             |
|            | 70        |         | 9.410      |                              | 0.120         |               |                                   |
|            | 82        |         | 9.430      |                              | 0.100         |               |                                   |
|            | 93        |         | 9.450      |                              | 0.080         |               |                                   |
|            | 107       |         | 9.470      |                              | 0.060         |               |                                   |
|            | 124       |         | 9.490      |                              | 0.040         |               |                                   |
| Octahedron | 107       | 0.087   | 8.550      | 0.100                        | 0.140         | 0.360         | 0.850                             |
|            | 115       |         | 8.570      |                              | 0.120         |               |                                   |
|            | 121       |         | 8.590      |                              | 0.100         |               |                                   |
|            | 136       |         | 8.610      |                              | 0.080         |               |                                   |
|            | 142       |         | 8.630      |                              | 0.060         |               |                                   |
|            | 183       |         | 8.650      |                              | 0.040         |               |                                   |

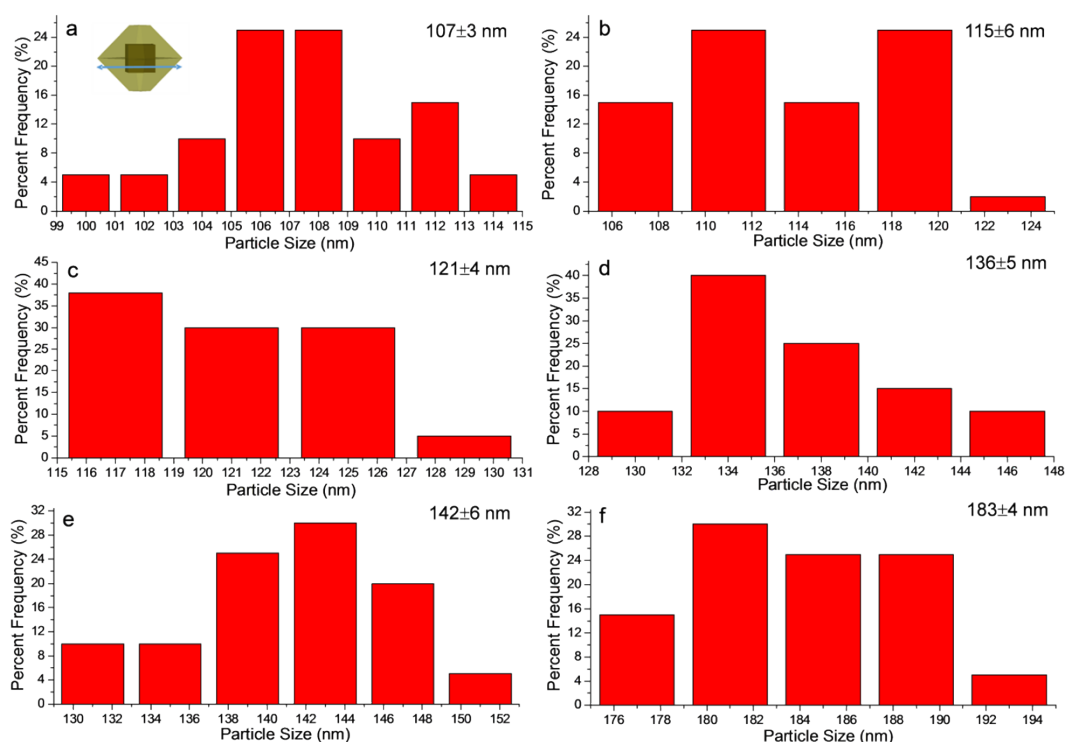

**Fig. S2** Size distribution histograms of (a–f) Pd–Cu<sub>2</sub>O octahedra. The drawing indicates the measured particle sizes. 29-nm Pd cubes were used.

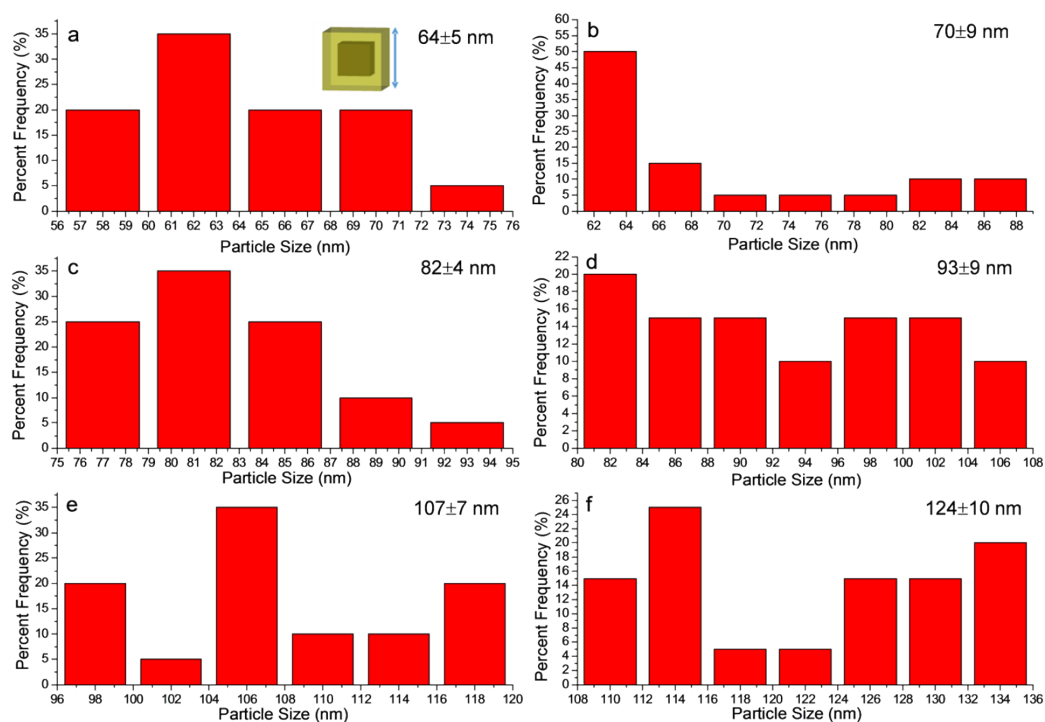

**Fig. S3** Size distribution histograms of (a–f) Pd–Cu<sub>2</sub>O octahedra. The drawing indicates the measured particle sizes. 29-nm Pd cubes were used.

**Table S2** Average particle sizes, standard deviations, and coefficients of variation of the Pd–Cu<sub>2</sub>O particles synthesized from 29-nm Pd cubes.

| Shape      | Pd cubic core used (ml) | Mean (nm) | Standard deviation (nm) | Coefficient of variation (%) |
|------------|-------------------------|-----------|-------------------------|------------------------------|
| Cube       | 0.140                   | 64        | 5                       | 7                            |
|            | 0.120                   | 70        | 9                       | 12                           |
|            | 0.100                   | 82        | 4                       | 4                            |
|            | 0.080                   | 93        | 9                       | 9                            |
|            | 0.060                   | 107       | 7                       | 6                            |
|            | 0.040                   | 124       | 10                      | 8                            |
| Octahedron | 0.140                   | 107       | 3                       | 2                            |
|            | 0.120                   | 115       | 6                       | 5                            |
|            | 0.100                   | 121       | 4                       | 3                            |
|            | 0.080                   | 136       | 5                       | 3                            |
|            | 0.060                   | 142       | 6                       | 4                            |
|            | 0.040                   | 183       | 4                       | 2                            |

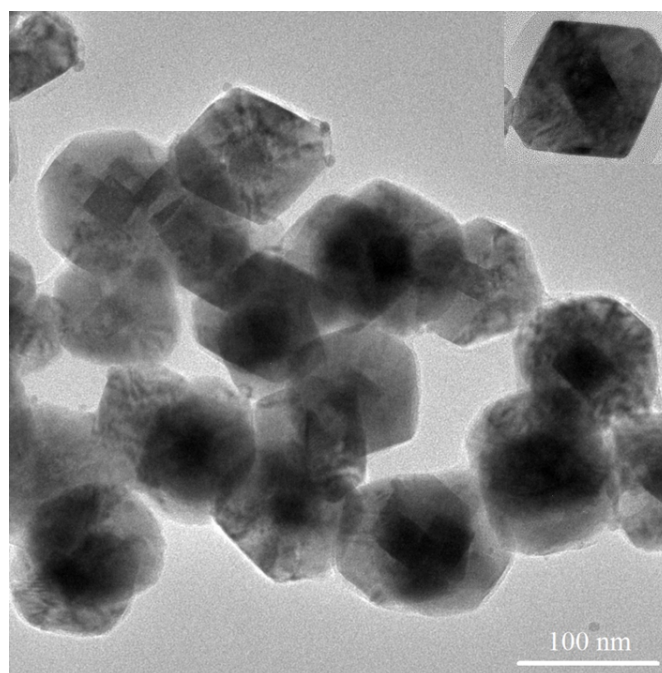

**Fig. S4** TEM image of the 107-nm Pd-Cu<sub>2</sub>O truncated octahedra synthesized using 29-nm Pd cubes. Inset shows another TEM image of the sample.

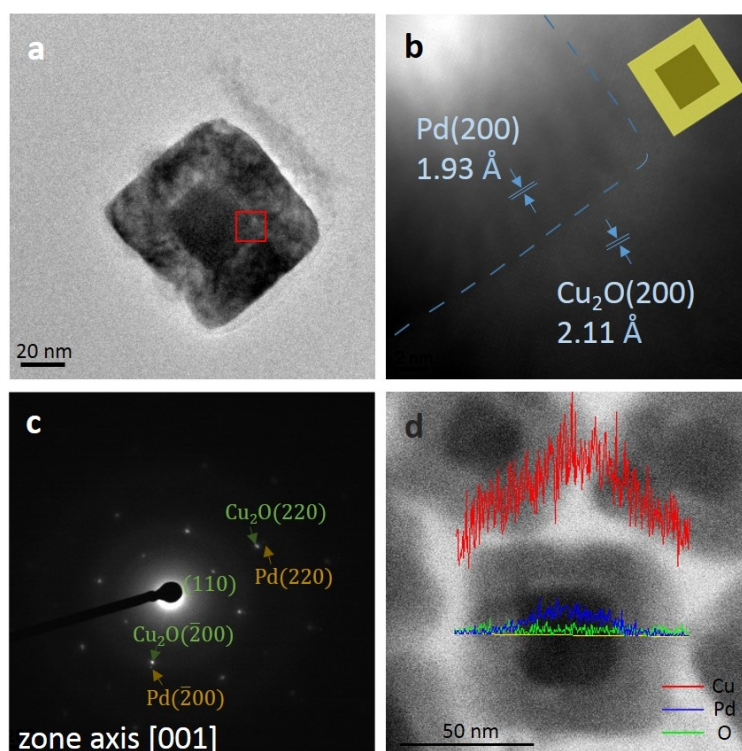

**Fig. S5** (a) TEM image, (b) HR-TEM image and drawing of a Pd-Cu<sub>2</sub>O cube, (c) SAED pattern, and d) EDS line scans of a Pd-Cu<sub>2</sub>O cube. The dashed line in panel b indicates the interface between Pd and Cu<sub>2</sub>O. The particle may be rotated while taking its SAED pattern, or a different cube was used for the SAED pattern, so that the SAED pattern does not match the particle orientation in the TEM image.

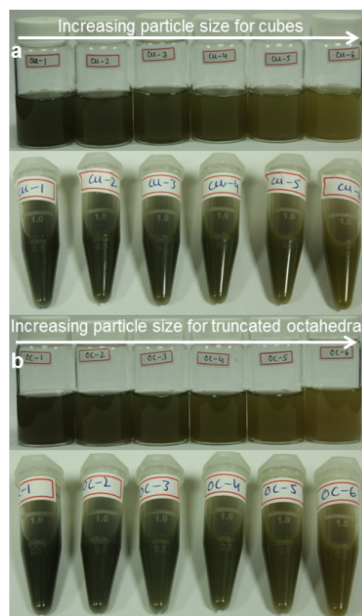

**Fig. S6** Optical photographs of Pd-Cu<sub>2</sub>O (a)cubes and (b) truncated octahedra with increasing particle size. The solution color changes from dark greenish to brown with increasing particle size. 29-nm Pd cubes were used.

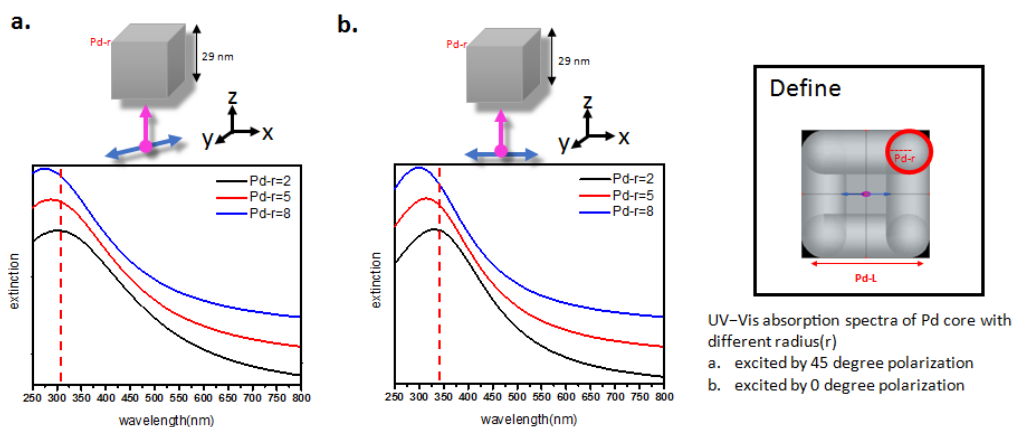

**Fig. S7** Simulation spectra of the 29-nm cubic Pd cores. The dash line indicates the band positions if radius of the corner red circle was selected to be 2 nm.

**Table S3** Amounts of reagents used in the synthesis of Pd–Cu<sub>2</sub>O core–shell nanocubes and octahedra with shell thickness control using 40-nm Pd cubic cores.

| Shape      | Size (nm) | SDS (g) | Water (ml) | 0.1 M CuCl <sub>2</sub> (ml) | Pd cubes (ml) | 1 M NaOH (ml) | 0.2 M NH <sub>2</sub> OH.HCl (ml) |
|------------|-----------|---------|------------|------------------------------|---------------|---------------|-----------------------------------|
| Cube       | 76        | 0.087   | 9.230      | 0.070                        | 0.300         | 0.250         | 0.150                             |
|            | 82        |         | 9.290      |                              | 0.240         |               |                                   |
|            | 93        |         | 9.330      |                              | 0.200         |               |                                   |
|            | 100       |         | 9.370      |                              | 0.160         |               |                                   |
|            | 109       |         | 9.410      |                              | 0.120         |               |                                   |
|            | 120       |         | 9.450      |                              | 0.080         |               |                                   |
| Octahedron | 102       | 0.087   | 8.390      | 0.100                        | 0.300         | 0.360         | 0.850                             |
|            | 116       |         | 8.450      |                              | 0.240         |               |                                   |
|            | 123       |         | 8.490      |                              | 0.200         |               |                                   |
|            | 136       |         | 8.530      |                              | 0.160         |               |                                   |
|            | 145       |         | 8.570      |                              | 0.120         |               |                                   |
|            | 178       |         | 8.610      |                              | 0.080         |               |                                   |

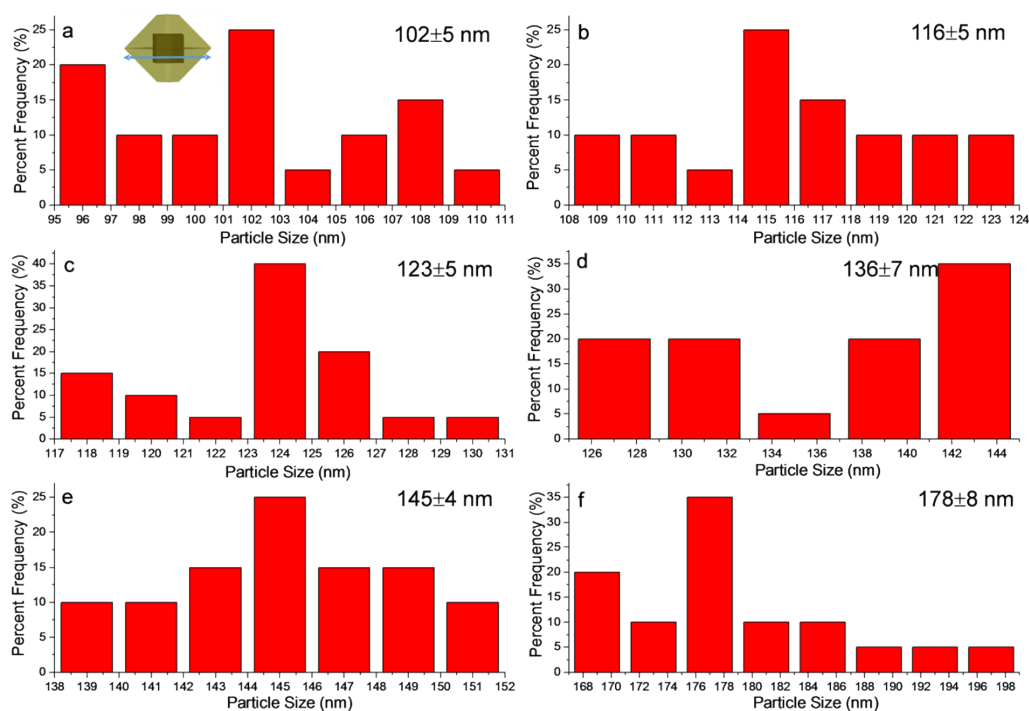

**Fig. S8** Size distribution histograms of Pd–Cu<sub>2</sub>O octahedra synthesized from 40-nm Pd cubes.

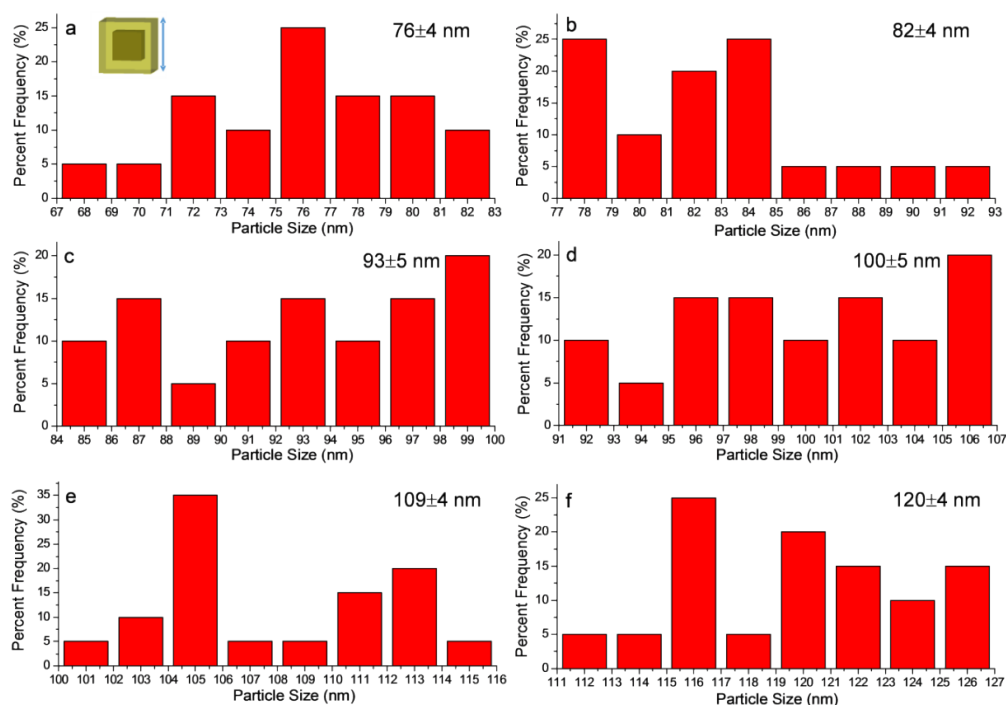

**Fig. S9** Size distribution histograms of Pd-Cu<sub>2</sub>O cubes synthesized from 40-nm Pd cubes.

**Table S4** Average particle sizes, standard deviations, and coefficients of variation of the Pd-Cu<sub>2</sub>O particles synthesized from 40-nm Pd cubes.

| Shape      | Pd cubic core used (ml) | Mean (nm) | Standard deviation (nm) | Coefficient of variation (%) |
|------------|-------------------------|-----------|-------------------------|------------------------------|
| Cube       | 0.300                   | 76        | 4                       | 5                            |
|            | 0.240                   | 82        | 4                       | 4                            |
|            | 0.200                   | 93        | 5                       | 5                            |
|            | 0.160                   | 100       | 5                       | 5                            |
|            | 0.120                   | 109       | 4                       | 3                            |
|            | 0.080                   | 120       | 4                       | 3                            |
| Octahedron | 0.300                   | 102       | 5                       | 4                            |
|            | 0.240                   | 116       | 5                       | 4                            |
|            | 0.200                   | 123       | 5                       | 4                            |
|            | 0.160                   | 136       | 7                       | 5                            |
|            | 0.120                   | 145       | 4                       | 2                            |
|            | 0.080                   | 178       | 8                       | 4                            |



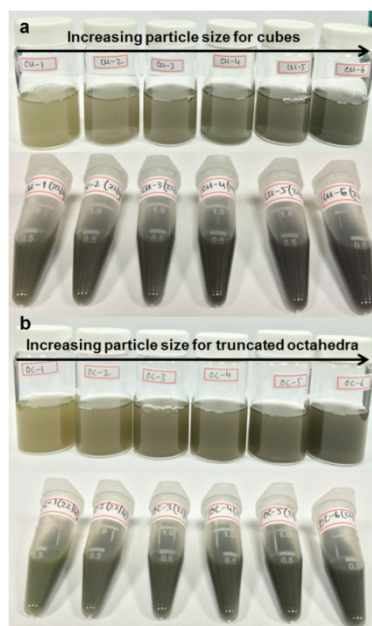

**Fig. S10** Photographs of the (a) Pd–Cu<sub>2</sub>O core–shell cubes and (b) truncated octahedra with different average particle sizes synthesized from 40-nm Pd cubes. The solution color changes from yellowish green to black with increasing particle size. Cubes appear darker than octahedra when particles size decreases.

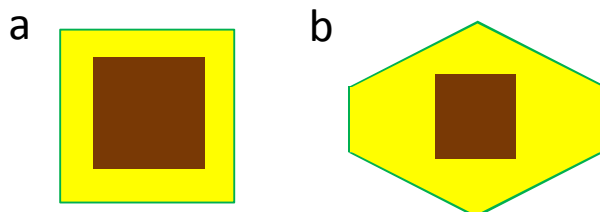

**Fig. S11** Schematic drawings of (a) a Pd–Cu<sub>2</sub>O cube and (b) a Pd–Cu<sub>2</sub>O truncated octahedron highlighting the presence of a thin surface layer (shown in green color) having different degrees of band bending.

### Numerical methods

We employed finite-difference time-domain method (FDTD solutions, Lumerical, Canada) to simulate the extinction spectra of our Pd–Cu<sub>2</sub>O nanoparticles. Refractive indices of Pd and Cu<sub>2</sub>O are obtained from literature data.<sup>34</sup> Refractive index of surrounding medium is set to be 1.36 in order to mimic the aqueous solution environment. Boundaries of the simulation area are set to be at least 2000 nm away from the outer surface of the shell such that spurious absorption of optical near fields is avoided. Uniform mesh size with discretization of  $1 \times 1 \times 1 \text{ nm}^3$  was used to cover the whole core–shell particles. To simulate the real structures, the edges and corners of the octahedral cores are rounded with cylinders or spheres with radius of 10 nm. About 3 femtosecond broadband plane wave source centered at 800 nm was



used as a source, and the polarization was aligned to the diagonal direction of the octahedral core. All particle dimensions are obtained from the SEM images.
